# Supplementary material
Source: publisher figshare collection journal article supplement (https://aacr.figshare.com/articles/dataset/_/23676024)
Supplement: Supplementary file 1 [file 41550144]

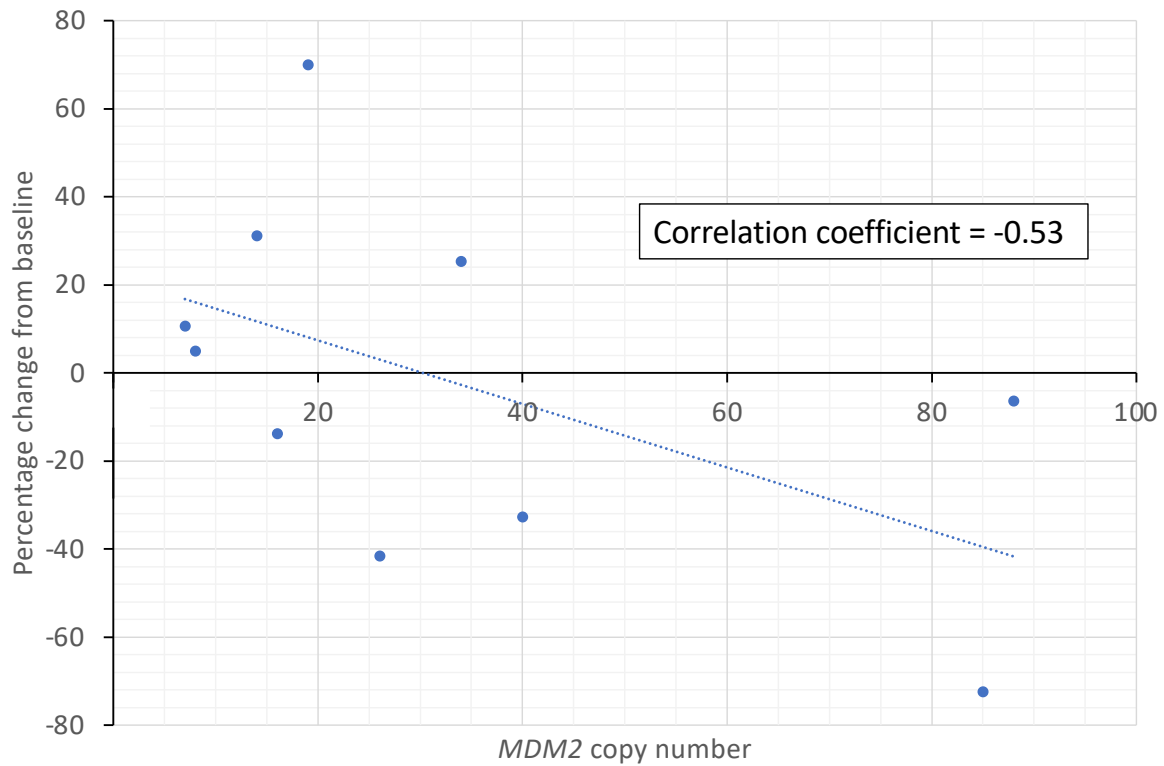

**Supplementary Fig. S5. Correlation between the *MDM2* copy number and tumor shrinkage.**

There was a correlation between the *MDM2* copy number and tumor shrinkage (correlation coefficient = -0.53)
